# Supplementary material
Source: publisher figshare collection journal article supplement (https://gsajournals.figshare.com/ndownloader/files/25065968)
Supplement: Supplementary file 1 [file 25065968]

#######################################################################
############# Simulation of an endemic infectious disease #############
#######################################################################
########## Supplemental file to: Hulst, De Jong, Bijma, 2020###########
################# � Andries D. Hulst, 2020 ############################

rm(list=ls())
setwd("") #Set to directory with subdirectory 'Populations' and first create a population file!

#Load required packages
library(doBy)
library(data.table)
library(dplyr)

#####Input Values#####

contactrate <- 0.03       #Beta
meanrec <- 0.02           #alpha
Inffrac <- 0.33           #Desired mean prevalence
ngroups <- 102            #Total number of herds
groupsize <- 102          #Number of individuals per herd
nsires_g <- 6             #No. of sires contributing offspring per herd
off_sire_g <- 17          #No. of offspring contributed by a single sire to a single herd
ndays <- 50              #Total simulated period
nreps <- 1                #Number of replicates
samplestart <- 20         #Length of the burn-in period
a2sus <- 1                #Additive genetic proportion of the total permanent variance for susceptibility (should match the population)
sigmaA <- 0.5             #Additive genetic standard deviation in susceptibility (should match the population)


################################################################
######################FUNCTIONS#################################
################################################################


#Loading the population file and sampling of herds (Sires contributing offspring to a herd)
load_pop <- function(pop_input,populationfile,nsires_g,off_sire_g){
populationfile<-paste0("./Populations/a2_",a2sus,"_sA_",sigmaA,"_rep_",as.character(rep),".pop")
population1 <- read.table(populationfile, header=TRUE, dec="." )

samples_sg <- matrix(nrow = ngroups, ncol = nsires_g)
samples_sg[,1] <- sample(1:ngroups, ngroups, replace = FALSE)
for (s in 2:nsires_g){
  repeat{
    samples_sg[,s]<- sample(1:ngroups, ngroups, replace = FALSE)
    samples_sgt<-samples_sg[,1:s]
    if (sum(apply(samples_sgt,MARGIN = 1, function(x) length(unique(x))))==(nrow(samples_sg)*s)) break
  }
}
offspring_r <- population1[population1$gen>0,]
offspring <- matrix(nrow = 0, ncol = ncol(offspring_r)+1)
colnames(offspring) <- c(colnames(offspring_r), "group")
for(s in 1:max(unique(offspring_r$SIRE))){
  offspring_sel <- offspring_r[offspring_r$SIRE==s,]
  offspring_sel$group <- rep(samples_sg[s,1:nsires_g],off_sire_g)
  offspring <- rbind(offspring, offspring_sel)
}
populationdata <- offspring[,2:4]
populationdata$Group <- NA
populationdata$Time <- NA
populationdata$I <- NA
populationdata <<- populationdata[0,]
offspring <<- offspring
}


#Infection of random fraction per herd
Status <- function(populationSel,Inffrac){
  
  Animals <- populationSel$ID
  Group <- populationSel$group
  Sire <- populationSel$SIRE
  Dam <- populationSel$DAM
  AnimalstatusI<- sample(x=c(0,1), size=length(Animals), replace=T, prob=c((1-Inffrac),Inffrac))
  AnimalstatusS<- 1-AnimalstatusI
  AnimalPhenoS <- populationSel$gamma
  alpha <- meanrec
  Timepoint <- rep(0,nrow(populationSel)) 
  Animalframe <<- data.table(Animals,Sire,Dam,Group,Timepoint,AnimalstatusS,AnimalstatusI,AnimalPhenoS,alpha, stringsAsFactors = FALSE)
  names(Animalframe) <<- c("ID","SIRE","DAM","Group","Time","S","I","gamma","alpha")
  Groupdetails <- data.table(Animals,Sire,Dam,Group,Timepoint,AnimalstatusI)
  names(Groupdetails) <- c("ID","SIRE","DAM","Group","Time","I")
  Groupdetails<<-Groupdetails
  Timemoment <<- 0
}

#Simulation of the endemic disease with Gillespie algorithm  
Endemic <- function(Animalframe,Timemoment,ndays,contactrate){  
  while ((sum(Animalframe$I) > 0)&(Timemoment<=ndays)) {
    InfectAnim <- Animalframe[Animalframe$I==1,]
    alphatot<-sum(InfectAnim$alpha)
    if (sum(Animalframe$S)>0) {
      SusAnim <- Animalframe[Animalframe$S==1,]
      SusAnimL <- list(SusAnim$ID)
      betamatrix <- matrix(nrow = nrow(SusAnim), ncol = 1,dimnames = c(SusAnimL,"beta"))
      betamatrix <- contactrate*SusAnim$gamma*(sum(Animalframe$I)/groupsize)
      betatot<-sum(betamatrix)
    }
    else{
      betatot<-0
      SusAnim <- SusAnim [0,]
    }
    totalrate <- betatot+alphatot
    probBeta <- betamatrix/totalrate
    probAlpha <- InfectAnim$alpha/totalrate
    cumbeta <- cumsum(probBeta)+sum(probAlpha)
    cumalpha <- cumsum(probAlpha)
    NextT <- rexp(1,rate = totalrate)
    Timemoment <- Timemoment+NextT
    samplex <- runif(1,0,1)
    InfectAnim$Time <- Timemoment
    if (sum(Animalframe$S)>0) {
      SusAnim$Time <- Timemoment
    }
    
    #Recovery event
    if (samplex <= sum(probAlpha)) {
      inv_indR <- which(cumalpha==min(cumalpha[cumalpha>=samplex]))
      InfectAnim$S[inv_indR] <- InfectAnim$S[inv_indR]+1
      InfectAnim$I[inv_indR] <- InfectAnim$I[inv_indR]-1
      inv_indR <- NA
    }
    #Infection Event
    if ((samplex > sum(probAlpha))) {
      inv_indI <- which(cumbeta==min(cumbeta[cumbeta>=samplex]))
      SusAnim$S[inv_indI] <- SusAnim$S[inv_indI]-1
      SusAnim$I[inv_indI] <- SusAnim$I[inv_indI]+1
      inv_indI <- NA
    }
    Animalframe <- rbind(InfectAnim,SusAnim)
    Animalframe <- orderBy(~ID, Animalframe)
    common_cols <- intersect(colnames(Animalframe), colnames(Groupdetails))
    Groupdetails <<- rbind(Groupdetails[,..common_cols], Animalframe[,..common_cols]) 
  }
} 

#Sampling of endemic data
Sampling <- function(populationdata, samplestart, ndays, contactrate){
  
  sample_times_1 <- seq(0,ndays, 1)  #For different time intervals than daily and monthly, change the last number in these two lines
  sample_times_2 <- seq(samplestart,ndays,30)
  populationdata$ID <- as.factor(populationdata$ID)
  data_sample_1 <- populationdata[0,]
  data_sample_2 <- data_sample_1
  
  print(paste("Start sampling daily data", date()))  #This section (until 'print(paste("Finished daily sampling",date()))') can be turned off (using #) if you don't want daily samples to save disk space and time
  for (i in 1:length(sample_times_1)) {
    sample1A <- populationdata[,max(Time[Time<=sample_times_1[i]]),by=ID]
    sample1B <- populationdata[ID %in% sample1A$ID & Time %in% sample1A$V1,]
    sample1B <- sample1B[,.SD[which.max(Time)],by=ID]
    sample1B$Time <- sample_times_1[i]
    data_sample_1 <- bind_rows(data_sample_1,sample1B)
  }
    
    
    
  fwrite(data_sample_1, paste0("./Endemic_data/Int_1/data_endemic_a2_",a2sus,"_sA_",sigmaA,"_rep_",as.character(rep),".dat"),sep = " ", row.names = FALSE)
  print(paste("Finished daily sampling",date()))
  
  print(paste("Start sampling monthly data", date()))
  for (i in 1:length(sample_times_2)) {
    sample2A <- populationdata[,max(Time[Time<=sample_times_2[i]]),by=ID]
    sample2B <- populationdata[ID %in% sample2A$ID & Time %in% sample2A$V1,]
    sample2B <- sample2B[,.SD[which.max(Time)],by=ID]
    sample2B$Time <- sample_times_2[i]
    data_sample_2 <- bind_rows(data_sample_2,sample2B)
  }
  fwrite(data_sample_2, paste0("./Endemic_data/Int_2/data_endemic_a2_",a2sus,"_sA_",sigmaA,"_rep_",as.character(rep),".dat"),sep = " ", row.names = FALSE)
  print(paste("Finished monthly sampling",date()))
}

#######Simulation PROGRAM#######

for (rep in 1:nreps) {
  print(paste("Start replicate",rep,date()))
  load_pop(pop_input,populationfile,nsires_g,off_sire_g)
    for (g in 1:ngroups){
      print(paste("start herd",g,date()))
      populationSel <- offspring[offspring$group==g,]
      Status(populationSel,Inffrac)  
      Endemic(Animalframe,Timemoment,ndays,contactrate)
      populationdata <- rbind(populationdata,Groupdetails)
    }
  Sampling(populationdata, samplestart, ndays, contactrate)
}
